# Supplementary material for: Green under siege: how the polyhexamethylene guanidine disinfectant attacks microalgae in aquatic ecosystems
Source: PeerJ. 2025 Jun 11;13:e19553. doi: 10.7717/peerj.19553 (PMC12166846; doi:10.7717/peerj.19553)
Supplement: Supplemental Information 1 [file peerj-13-19553-s001.xlsx]

## Sheet: Raw data
Biomass(mg/L)	R1	R2	R3	R4	R5		Carbohydrates(mg/L)	R1	R2	R3	R4	R5		Proteins(mg/L)	R1	R2	R3	R4	R5
1d	20.4256	20.9178	16.7341	15.9958	14.027		1d	4.14039	5.12676	3.19485	6.17911	4.75292		1d	1.93855	4.4506	4.35994	2.26656	1.99459
	20.4256	20.9178	17.4724	16.488	14.027			4.37911	5.34038	6.72887	4.05869	4.91315			2.53855	1.4506	1.81325	2.35723	2.35723
	20.4256	21.1639	17.2263	16.488	14.2731			6.30164	4.91315	5.6608	4.69953	4.59272			2.53855	1.4506	0.906625	2.1759	1.63192
2d	22.3944	24.1171	19.6873	18.7029	14.5192		2d	5.55927	6.61269	4.07864	5.46608	3.03992		2d	2.4479	2.53855	2.35724	2.4479	2.4479
	22.6405	24.3632	19.9334	18.949	14.7653			5.61268	5.18545	5.18545	5.18545	4.61268			2.35722	2.1759	2.35723	2.53855	2.35723
	22.8866	23.3788	19.9334	18.949	14.7653			5.50587	5.03991	5.97183	5.14671	4.46714			2.53855	2.9012	2.35723	2.35723	2.53855
4d	27.8086	28.3008	23.1327	21.41	10.0894		4d	6.67547	7.04931	6.88907	6.03461	4.32886		4d	4.69459	2.97078	1.81325	1.572	1.12802
	28.0547	28.3008	23.1327	21.6561	10.0894			6.19484	6.72887	7.1561	6.30164	8.11737			2.9012	2.35842	1.7253	1.36265	1.14397
	28.0547	28.5469	22.8866	21.6561	10.3355			7.1561	7.36972	6.62207	5.76761	5.34038			1.08795	2.55843	1.9012	1.78132	1.54398
8d	46.5122	49.2817	34.2072	33.9611	2.4603		8d	7.71055	7.26291	7.23885	6.83568	6.26291		8d	3.53584	3.65724	2.71989	2.4479	1.4506
	46.7583	49.5278	34.2072	33.715	2.7064			8.41056	6.62207	7.0493	7.1561	6.51526			3.26385	2.53855	2.1759	2.53855	1.08795
	46.5122	49.2817	34.2072	34.2072	2.4603			7.91056	7.90376	7.4284	6.51526	6.01056			3.80783	2.9759	3.26385	2.35722	1.81325
16d	112.959	119.112	99.9159	98.9315	4.4291		16d	6.40845	6.88907	5.7142	5.39378	4.32569		16d	7.0997	4.32379	4.62379	3.08254	1.63194
	113.205	119.604	100.162	98.9315	4.4291			6.08803	6.40845	6.30164	5.34038	3.09742			6.85963	4.50783	4.3518	3.26385	1.81325
	113.205	119.604	100.162	98.9315	4.183			6.72887	7.36972	5.12676	5.44718	5.55399			6.43975	5.03975	4.89578	2.9012	1.4506
Chlorophyll a (mg/L)	R1	R2	R3	R4	R5		Chlorophyll b(mg/L)	R1	R2	R3	R4	R5		Maximum photosynthetic efficiency of photosystem ll	R1	R2	R3	R4	R5
1d	0.85694	0.71925	0.48947	0.48947	0.4324		1d	0.53868	0.32981	0.12089	0.12089	0.05325		1d	0.62	0.45	0.51	0.17	0.06
	0.89454	0.71313	0.45565	0.50449	0.44682			0.59908	0.33231	0.11585	0.09573	0.06536			0.59	0.43	0.56	0.17	0.08
	0.81934	0.72534	0.52329	0.47445	0.38903			0.47828	0.32728	0.12593	0.14605	0.07039			0.62	0.44	0.52	0.17	0.07
2d	0.97494	0.81377	0.7476	0.67802	0.39045		2d	0.95519	0.64184	0.54501	0.58395	0.29451		2d	0.5	0.17	0.08	0.1	0
	0.9303	0.77525	0.65974	0.63619	0.40594			0.7951	0.62925	0.51478	0.55373	0.30708			0.5	0.14	0.08	0.08	0
	1.01955	0.85229	0.83543	0.71982	0.37493			0.84525	0.65443	0.57521	0.61414	0.28191			0.5	0.17	0.08	0.09	0
4d	1.5787	1.36397	1.10037	0.8885	0.45252		4d	1.3038	1.06975	0.85579	0.72491	0.46815		4d	0.46	0.24	0.35	0.24	0.01
	1.38227	1.31647	1.15677	0.98292	0.54791			1.06219	0.95649	0.94639	0.79034	0.60907			0.48	0.28	0.31	0.22	0
	1.77513	1.41144	1.04397	0.79405	0.3571			1.54541	1.18298	0.76519	0.65945	0.3272			0.44	0.26	0.36	0.23	0.02
8d	2.35634	2.33948	1.89405	1.73333	0.36088		8d	1.99849	2.11927	1.72411	1.51522	0.38256		8d	0.37	0.39	0.38	0.37	0.1
	2.32672	2.29203	1.73288	1.68869	0.33927			1.96324	2.12931	1.60076	1.50513	0.37249			0.4	0.43	0.38	0.34	0.1
	2.38593	2.3869	2.05519	1.77794	0.38249			2.03371	2.1092	1.84743	1.52528	0.39263			0.4	0.41	0.41	0.34	0.1
16d	6.26601	6.36389	5.3992	4.80337	0.18703		16d	5.35862	5.81158	4.76711	4.13035	0.22651		16d	0.62	0.54	0.51	0.49	0.03
	6.30075	6.12991	5.441	4.78029	0.18984			5.31585	5.63287	4.7973	4.00703	0.20638			0.66	0.57	0.51	0.44	0.02
	6.23127	6.59787	5.35737	4.82642	0.18422			5.40139	5.99029	4.73689	4.25364	0.24664			0.64	0.57	0.57	0.48	0.04
Superoxide Dismutase(U/mL)	R1	R2	R3	R4	R5		Catalase(U/mL)	R1	R2	R3	R4	R5		Malondialdehyde (nmol/L)	R1	R2	R3	R4	R5
3h	24.4252	26.3427	27.5655	29.522	28.324		3h	14.0303	15.5557	16.7538	17.5549	20.3847		3h	3.59914	3.82859	3.89506	4.54699	4.5215
	24.4039	26.651	27.608	29.6708	28.4941			13.8753	15.7281	16.6999	17.7168	20.5275			3.64558	3.88869	3.93785	4.45685	4.51421
	24.4464	26.0343	27.5229	29.3731	28.1538			14.1852	15.3833	16.8078	17.3929	20.2419			3.62236	3.85864	3.91646	4.50192	4.51786
6h	28.0511	25.1908	26.2682	30.486	29.5893		6h	12.9523	16.4073	18.3194	20.174	22.5092		6h	3.52539	3.93148	3.77487	4.46049	4.53789
	28.0121	25.0632	26.2115	30.3513	29.7984			13.0429	16.3167	18.3681	20.2245	22.6694			3.47167	3.91236	3.83679	4.43955	4.46596
	28.09	25.3184	26.3249	30.6207	29.3802			12.8618	16.4978	18.2706	20.1235	22.349			3.49853	3.92192	3.80583	4.45002	4.50192
9h	22.8373	30.4435	30.7979	32.5914	35.3276		9h	12.2714	16.6772	18.5353	20.5675	22.6381		9h	3.14843	4.2101	4.48963	5.01045	5.00863
	22.5183	30.5215	30.7838	32.322	35.2142			12.2174	16.7347	18.403	20.6807	22.5266			3.20397	4.23013	4.39858	4.9194	5.06872
	23.1563	30.3655	30.8121	32.8607	35.441			12.3254	16.6197	18.6677	20.4544	22.7495			3.1762	4.22012	4.4441	4.96492	5.03868
12h	26.0698	31.0815	31.0319	32.6304	33.9985		12h	13.0359	16.9976	18.5841	20.8392	22.3682		12h	3.16027	4.5998	4.55701	4.92486	4.954
	25.8358	30.8972	31.1027	32.5347	33.9737			12.914	17.1073	18.5876	20.9454	22.3943			3.21672	4.52423	4.59252	4.97676	4.90847
	26.3037	31.2658	30.961	32.7261	34.0233			13.1578	16.8879	18.5806	20.733	22.3421			3.1885	4.56202	4.57476	4.95081	4.93123
24h	25.1908	29.9792	28.9726	34.1119	34.0268		24h	11.655	16.2802	17.8492	20.9211	21.3355		24h	3.16573	4.46778	4.24288	5.03776	4.70178
	25.5097	29.6566	28.884	34.243	34.2147			11.5731	16.1287	17.8213	20.9524	20.9454			3.16846	4.435	4.20919	5.07054	4.73547
	24.8718	30.3017	29.0612	33.9808	33.839			11.7368	16.4317	17.8771	20.8897	21.7256			3.1671	4.45139	4.22603	5.05415	4.71863
Superoxide Dismutase(U/mL)	R1	R2	R3	R4	R5		Catalase(U/mL)	R1	R2	R3	R4	R5		Malondialdehyde (nmol/L)	R1	R2	R3	R4	R5
1d	25.1908	29.9792	28.9726	34.1119	34.0268		1d	11.655	16.2802	17.8492	20.9211	21.3355		1d	3.16573	4.46778	4.24288	5.03776	4.70178
	25.5097	29.6566	28.884	34.243	34.2147			11.5731	16.1287	17.8213	20.9524	20.9454			3.16846	4.435	4.20919	5.07054	4.73547
	24.8718	30.3017	29.0612	33.9808	33.839			11.7368	16.4317	17.8771	20.8897	21.7256			3.1671	4.45139	4.22603	5.05415	4.71863
2d	30.1387	33.8248	34.9838	37.7803	36.88		2d	13.3807	19.1152	20.47	22.5667	24.531		2d	3.63192	5.06235	4.78009	5.13337	5.28907
	30.1245	34.08	35.0441	37.5889	37.0998			13.318	19.1866	20.5763	22.558	24.4596			3.71296	5.04687	4.85839	5.09604	5.32549
	30.1529	33.5696	34.9236	37.9717	36.6603			13.4434	19.0438	20.3638	22.5754	24.6024			3.67244	5.05461	4.81924	5.1147	5.30728
4d	34.3445	34.6357	34.6704	37.3213	38.1856		4d	21.2034	18.3951	19.4146	22.1465	23.7383		4d	3.42185	4.7482	4.89463	5.29463	5.4293
	34.454	34.3642	34.5631	36.7987	38.3543			20.8932	18.4275	19.568	21.7928	23.8019			3.54161	4.76415	4.94692	5.19286	5.22841
	34.6325	34.1332	34.1124	36.4352	38.6512			20.7397	18.3967	19.7892	21.5928	23.843			3.50072	4.86615	5.09146	5.18578	5.53182
8d	34.3163	28.7674	31.3798	34.4412	34.316		8d	14.9559	18.7305	20.8868	21.9169	23.8767		8d	4.18563	4.39575	4.49574	5.12384	5.21391
	34.6151	30.4152	30.8777	34.7815	34.9712			14.9328	18.6673	20.8964	22.1026	24.015			3.87376	4.38193	4.4286	4.94384	4.84004
	34.4357	29.5534	31.1145	34.4635	34.3563			14.8926	18.6574	20.9173	22.0976	24.0975			3.99455	4.4563	4.57733	5.03742	5.09759
16d	37.2345	25.3538	25.3432	29.9189	31.0354		16d	16.0782	19.8762	19.9964	21.7186	23.3416		16d	4.23742	4.47051	4.58797	5.07236	4.85111
	36.9864	25.2758	25.2546	29.5928	31.3579			16.1356	20.9454	19.8518	21.8719	23.4635			4.19826	4.44775	4.58159	5.02046	4.93397
	37.4826	25.4318	25.4318	30.245	30.7129			16.0207	18.807	20.1409	21.5654	23.2197			4.21784	4.45913	4.58478	5.04641	4.89254
